# Supplementary material for: Use of a Novel Extremophilic Xylanase for an Environmentally Friendly Industrial Bleaching of Kraft Pulps
Source: MDPI journal article supplement (doi:10.3390/ijms232113423), 2022-11-03
Supplement: s1 [file s1]

# Supplementary Material

## Results

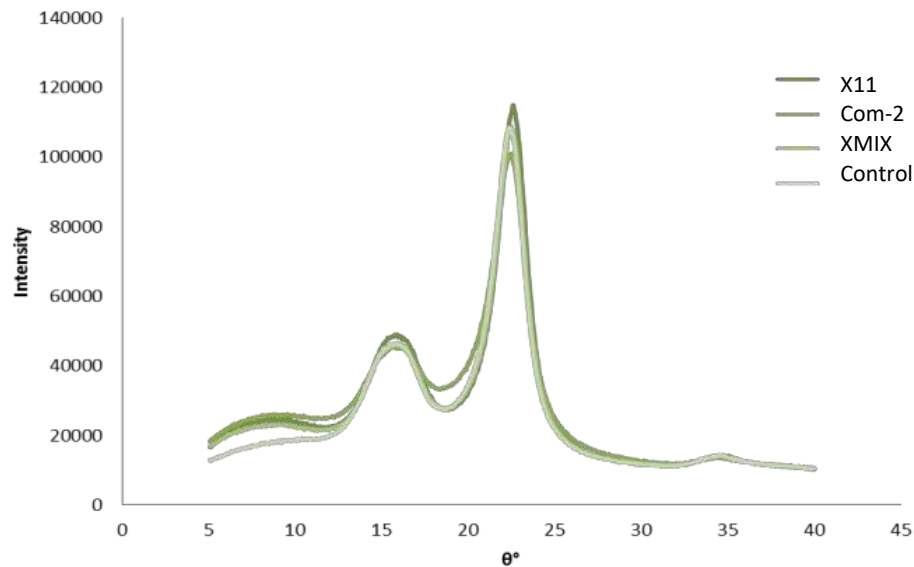

**Figure S1.** X-ray diffraction spectra of the pulps treated with the three xylanases (Xyn 11, Com-2, XMIX) compared to the control pulp.

**Table S1.** Crystallinity values for the pulps treated with the three xylanases (Xyn 11, Com-2, XMIX) compared to the control pulp.

| Enzyme tested | Crystallinity index of the treated pulp (%) |
|---------------|---------------------------------------------|
| X11           | 76.3                                        |
| Com-2         | 67.2                                        |
| XMIX          | 74.9                                        |
| Control       | 74.8                                        |

**Table S2.** Analysis of the effluents generated by the Xyn11-assited bleaching (XD<sub>0</sub>EpD<sub>1</sub>) of eucalyptus kraft pulp at pilot scale compared with the reference sequence (D<sub>0</sub>EpD<sub>1</sub>D<sub>2</sub>).

| Bleaching sequence            | X D Ep D | D Ep D D |
|-------------------------------|----------|----------|
| <b>COD, kg/T of o.d. pulp</b> |          |          |
| After X                       | 8.3      | -        |
| After D <sub>0</sub>          | 5.4      | 16.0     |
| After Ep                      | 11.9     | 23.4     |
| After D <sub>1</sub>          | 1.9      | 7.6      |
| After D <sub>2</sub>          | -        | 2.6      |
| <b>BOD, kg/T of o.d. pulp</b> |          |          |
| After X                       | 2.1      |          |
| After D <sub>0</sub>          | 1.6      | 2.1      |
| After Ep                      | 5.1      | 5.7      |
| After D <sub>1</sub>          | 0.9      | 0.6      |
| After D <sub>2</sub>          | -        | 0.04     |
| <b>AOX, kg/T of o.d. pulp</b> |          |          |
| After X                       | 0        | -        |
| After D <sub>0</sub>          | 0.15     | 0.16     |
| After Ep                      | 0.03     | 0.03     |
| After D <sub>1</sub>          | 0.04     | 0.05     |
| After D <sub>2</sub>          | -        | 0.02     |

## Material and Methods

**Table S3.** Medium composition for production of Xyn 11 at pilot scale in *E. coli*.

| Component                                       | g/L                                       |
|-------------------------------------------------|-------------------------------------------|
| CSL                                             | 15                                        |
| Yeast extract                                   | 10                                        |
| (NH <sub>4</sub> ) <sub>2</sub> SO <sub>4</sub> | 0.4                                       |
| KH <sub>2</sub> PO <sub>4</sub>                 | 2.66                                      |
| MgSO <sub>4</sub> x 7H <sub>2</sub> O           | 0.24                                      |
| K <sub>2</sub> HPO <sub>4</sub>                 | 1.06                                      |
| Citric acid                                     | 0.34                                      |
| Antifoam                                        | 0.2                                       |
| Technical water                                 | Adjusted for start of fermentation volume |

**Table S4.** Standards used for the determination of the papermaking properties.

| Papermaking Property             | Determination Procedure | Limit for acceptance (%) |
|----------------------------------|-------------------------|--------------------------|
| Drainage index, Schopper-Riegler | ISO 5267-1:1999         | ±4%                      |
| Air Resistance – Gurley method   | ISO 5636-5:2013         | ±20%                     |
| Burst Index                      | ISO 2758:2015           | ± 15%                    |
| Tensile Index                    | ISO 1924-2:2008         | ± 12%                    |
| Tear Index                       | ISO 1974:2012           | ± 9%                     |
| Scott Test                       | TAPPI 569               | ± 6%                     |
